# Supplementary material for: Role of cytoskeletal proteins in cerebral cavernous malformation signaling pathways: a proteomic analysis
Source: Royal Society of Chemistry journal article supplement (doi:10.1039/c3mb70199a), 2014-04-17
Supplement: c3mb70199a1.pdf [file c3mb70199a1.pdf]

**Supplementary Table 1. Differentially Expressed Cell Line-Specific Proteins and Their Relative Levels of Expression.**

|                                                           | Cell line 4 | Cell line 1 | Cell line 2 | Cell line 3 | Cell line 5 |
|-----------------------------------------------------------|-------------|-------------|-------------|-------------|-------------|
| Identified Proteins (120)                                 | WT          | ccm1        | ccm2        | ccm3        | mock        |
| <b>Putative uncharacterized protein</b><br>Q3TQ13         | 112.80      | 144.09      | 147.85      | 127.45      | 140.37      |
| <b>Elongation factor</b><br>EF2                           | 105.31      | 129.58      | 157.70      | 142.95      | 116.15      |
| <b>MFLJ00343 protein (Fragment)</b><br>Q6KAM8             | 111.27      | 80.10       | 80.19       | 59.64       | 100.42      |
| <b>Alpha-enolase</b><br>ENOA                              | 79.14       | 108.11      | 110.29      | 110.52      | 96.69       |
| <b>Putative uncharacterized protein</b><br>Q3UBU0         | 114.64      | 87.22       | 64.46       | 52.00       | 101.27      |
| <b>Pyruvate kinase isozymes M1/M2</b><br>KPYM_MOUSE       | 85.43       | 90.44       | 95.65       | 94.76       | 88.10       |
| <b>Putative uncharacterized protein</b><br>Q9DC41         | 112.67      | 86.21       | 64.19       | 64.56       | 107.20      |
| <b>Heat shock protein HSP 90-alpha</b><br>HS90A           | 55.77       | 104.64      | 89.51       | 86.09       | 69.91       |
| <b>Glyceraldehyde-3-phosphate dehydrogenase</b><br>D2KHZ9 | 72.54       | 73.36       | 93.79       | 84.45       | 78.65       |
| <b>Transitional endoplasmic reticulum ATPase</b><br>TERA  | 58.80       | 51.88       | 53.26       | 44.56       | 84.34       |
| <b>Elongation factor 1-alpha 1</b><br>EF1A1               | 65.50       | 81.40       | 78.87       | 79.18       | 77.10       |
| <b>Clathrin, heavy polypeptide (Hc)</b><br>Q5SXR6         | 43.79       | 46.46       | 11.70       | 28.55       | 1.86        |
| <b>Putative uncharacterized protein</b><br>Q3TIZ0         | 68.75       | 78.61       | 82.39       | 76.96       | 49.56       |
| <b>Ahnak protein (Fragment)</b><br>A0PJF4                 | 28.12       | 6.73        | 13.44       | 19.86       | 38.20       |
| <b>Myosin-9</b><br>MYH9                                   | 1           | 34.52       | 0.00        | 161.97      | 1           |
| <b>Heat shock protein 84b</b><br>Q71LX8                   | 67.76       | 68.61       | 72.49       | 60.65       | 46.94       |
| <b>Tubulin beta-4 chain</b><br>TBB4                       | 51.55       | 71.32       | 66.14       | 77.35       | 53.27       |

|                                                                        | Cell line 4 | Cell line 1 | Cell line 2 | Cell line 3 | Cell line 5 |
|------------------------------------------------------------------------|-------------|-------------|-------------|-------------|-------------|
| <b>L-lactate dehydrogenase A chain</b><br>LDHA                         | 57.30       | 64.33       | 66.19       | 64.65       | 40.31       |
| <b>Putative uncharacterized protein</b><br>Q3UAA9                      | 60.03       | 57.17       | 63.05       | 58.92       | 69.96       |
| <b>Myb-binding protein 1A</b><br>MBB1A                                 | 32.28       | 20.52       | 25.18       | 11.41       | 3.97        |
| <b>Putative uncharacterized protein</b><br>Q3UCD3                      | 55.59       | 39.14       | 45.19       | 59.56       | 51.06       |
| <b>Protein disulfide-isomerase A3</b><br>PDIA3                         | 47.17       | 38.99       | 20.21       | 4.74        | 70.36       |
| <b>Putative uncharacterized protein</b><br>Q8BV87                      | 54.68       | 60.94       | 33.74       | 35.38       | 51.31       |
| <b>Putative uncharacterized protein</b><br>Q8CE30                      | 26.43       | 13.79       | 22.16       | 15.12       | 28.35       |
| <b>Protein disulfide-isomerase</b><br>PDIA1                            | 43.11       | 34.20       | 15.79       | 26.89       | 57.60       |
| <b>Fructose-bisphosphate aldolase</b><br>A6ZI44                        | 20.68       | 15.00       | 48.91       | 37.70       | 19.25       |
| <b>Putative uncharacterized protein</b><br><b>(Fragment)</b><br>Q3U7N9 | 24.46       | 3.37        | 12.72       | 12.34       | 31.21       |
| <b>Putative uncharacterized protein</b><br>Q3UXC2                      | 24.84       | 33.24       | 35.65       | 36.05       | 31.71       |
| <b>Triosephosphate isomerase</b><br>TPIS                               | 26.78       | 44.90       | 38.66       | 40.78       | 31.46       |
| <b>Putative uncharacterized protein</b><br>Q3TVD2                      | 41.23       | 27.32       | 23.02       | 11.31       | 39.25       |
| <b>Putative uncharacterized protein</b><br>Q3U8U8                      | 25.49       | 10.34       | 7.24        | 7.76        | 6.73        |
| <b>Tln1 protein</b><br>Q0V930                                          | 10.01       | 4.60        | 2.06        | 2.89        | 28.49       |
| <b>Protein disulfide-isomerase A4</b><br>PDIA4                         | 26.43       | 7.71        | 1.01        | 0.96        | 27.54       |
| <b>60 kDa heat shock protein,</b><br><b>mitochondrial</b><br>CH60      | 32.47       | 24.36       | 1.05        | 0.00        | 52.67       |
| <b>Adenylyl cyclase-associated protein</b><br>Q3TC53                   | 35.28       | 30.86       | 32.79       | 25.86       | 38.74       |

|                                                    | Cell line 4 | Cell line 1 | Cell line 2 | Cell line 3 | Cell line 5 |
|----------------------------------------------------|-------------|-------------|-------------|-------------|-------------|
| <b>Non-muscle alpha-actinin 4</b><br>Q1A602        | 18.11       | 5.50        | 2.12        | 0.00        | 5.58        |
| <b>Peroxioredoxin 1</b><br>B1AXW7                  | 17.67       | 28.40       | 20.22       | 23.91       | 18.55       |
| <b>Gag-pro-pol polyprotein</b><br>Q1KYL9           | 24.62       | 6.89        | 5.18        | 7.59        | 7.29        |
| <b>Phosphoglycerate kinase 1</b><br>PGK1           | 9.79        | 11.24       | 20.12       | 27.53       | 10.10       |
| <b>Putative uncharacterized protein</b><br>Q3TXW2  | 8.29        | 2.22        | 12.39       | 3.58        | 10.05       |
| <b>Ubiquitin B</b><br>Q6NZC5                       | 36.03       | 28.96       | 30.71       | 33.17       | 44.37       |
| <b>Glucose-6-phosphate isomerase</b><br>G6PI       | 18.14       | 26.17       | 22.14       | 26.65       | 17.44       |
| <b>Putative uncharacterized protein</b><br>Q8BGJ5  | 12.76       | 1.06        | 3.20        | 9.71        | 4.47        |
| <b>Annexin A1</b><br>B7STB7                        | 19.17       | 17.23       | 17.93       | 20.86       | 24.48       |
| <b>Putative uncharacterized protein</b><br>Q564E8  | 24.71       | 28.96       | 30.67       | 21.59       | 19.65       |
| <b>Tubulin beta-5 chain</b><br>TBB5                | 30.37       | 34.47       | 34.98       | 30.37       | 28.75       |
| <b>Cofilin-1</b><br>COF1                           | 26.49       | 27.65       | 33.88       | 20.95       | 31.81       |
| <b>Ubiquitin-activating enzyme E1</b><br>B9EHN0    | 1.91        | 5.90        | 12.91       | 2.92        | 2.77        |
| <b>Elongation factor 1-gamma</b><br>EF1G           | 17.01       | 16.08       | 13.54       | 17.94       | 12.16       |
| <b>T-complex protein 1 subunit epsilon</b><br>TCPE | 11.26       | 8.97        | 9.45        | 7.69        | 14.07       |
| <b>D-3-phosphoglycerate dehydrogenase</b><br>SERA  | 19.08       | 18.54       | 24.29       | 13.23       | 7.99        |
| <b>Phosphoglycerate mutase 1</b><br>PGAM1          | 23.65       | 31.35       | 27.45       | 26.62       | 25.98       |
| <b>Putative uncharacterized protein</b><br>Q3U9Y8  | 30.46       | 25.35       | 10.64       | 9.55        | 2.81        |
| <b>Putative uncharacterized protein</b><br>Q3UXQ6  | 18.11       | 24.13       | 32.75       | 25.73       | 14.63       |

|                                                                  | Cell line 4 | Cell line 1 | Cell line 2 | Cell line 3 | Cell line 5 |
|------------------------------------------------------------------|-------------|-------------|-------------|-------------|-------------|
| <b>Ahnak protein (Fragment)</b><br>A0JLR7                        | 11.64       | 3.45        | 10.57       | 19.83       | 14.73       |
| <b>Ribosomal protein, large, P0</b><br>Q5FWB6                    | 20.14       | 39.30       | 28.37       | 22.75       | 6.33        |
| <b>6-phosphogluconate dehydrogenase, decarboxylating</b><br>6PGD | 2.03        | 14.94       | 16.73       | 25.70       | 10.15       |
| <b>MKIAA0002 protein (Fragment)</b><br>Q6A0F1                    | 4.22        | 0.00        | 10.37       | 9.22        | 0.00        |
| <b>Putative uncharacterized protein</b><br>Q3TI62                | 15.36       | 25.13       | 24.16       | 22.58       | 15.98       |
| <b>Protein disulfide-isomerase A6</b><br>PDIA6                   | 20.74       | 18.30       | 11.68       | 6.66        | 26.18       |
| <b>Annexin A5</b><br>ANXA5                                       | 17.17       | 13.71       | 19.07       | 18.07       | 17.04       |
| <b>Putative uncharacterized protein</b><br>Q3U536                | 21.74       | 24.22       | 30.45       | 20.89       | 20.51       |
| <b>Putative uncharacterized protein</b><br>Q3UB67                | 15.67       | 16.26       | 17.93       | 13.40       | 15.58       |
| <b>Putative uncharacterized protein</b><br>Q542X7                | 8.32        | 5.65        | 13.79       | 6.70        | 9.15        |
| <b>14-3-3 protein epsilon</b><br>1433E                           | 19.93       | 30.93       | 23.05       | 23.67       | 18.70       |
| <b>Peptidyl-prolyl cis-trans isomerase</b><br>Q3UAJ1             | 23.46       | 16.10       | 27.52       | 20.79       | 22.37       |
| <b>Transgelin-2</b><br>TAGL2                                     | 9.92        | 13.80       | 21.02       | 15.08       | 14.88       |
| <b>T-complex protein 1 subunit delta</b><br>Q3TII0               | 8.51        | 8.05        | 13.73       | 8.49        | 3.82        |
| <b>Putative uncharacterized protein</b><br>Q3UBI6                | 22.49       | 19.54       | 25.34       | 18.90       | 12.97       |
| <b>Putative uncharacterized protein</b><br>Q3U6X2                | 14.04       | 17.49       | 15.91       | 10.41       | 15.68       |
| <b>Putative uncharacterized protein</b><br>Q3UCL7                | 5.32        | 7.79        | 25.21       | 22.65       | 4.72        |
| <b>40S ribosomal protein S7</b><br>RS7                           | 24.08       | 19.76       | 26.25       | 18.97       | 22.67       |

|                                                                                      | Cell line 4 | Cell line 1 | Cell line 2 | Cell line 3 | Cell line 5 |
|--------------------------------------------------------------------------------------|-------------|-------------|-------------|-------------|-------------|
| <b>Guanine nucleotide-binding protein subunit beta-2-like 1</b><br>GBLP              | 14.39       | 13.77       | 22.20       | 16.08       | 0.85        |
| <b>Down syndrome cell adhesion molecule-like protein (Fragment)</b><br>Q8R4B4        | 24.08       | 19.62       | 23.15       | 21.05       | 17.79       |
| <b>Laminin receptor (Fragment)</b><br>B2CY77                                         | 13.29       | 24.36       | 17.93       | 14.19       | 15.98       |
| <b>Putative uncharacterized protein</b><br>Q3UM23                                    | 3.81        | 0.00        | 0.00        | 21.03       | 3.77        |
| <b>Putative uncharacterized protein</b><br>Q3UMM1                                    | 14.20       | 22.81       | 31.68       | 17.14       | 16.14       |
| <b>Putative uncharacterized protein</b><br>Q3TXS9                                    | 13.33       | 19.53       | 22.10       | 18.90       | 4.73        |
| <b>Putative uncharacterized protein</b><br>Q3TFK4                                    | 14.08       | 0.00        | 9.45        | 10.05       | 13.12       |
| <b>Profilin</b><br>Q8CEH8                                                            | 19.27       | 20.44       | 16.92       | 19.83       | 16.89       |
| <b>Putative uncharacterized protein</b><br>Q8C483                                    | 14.26       | 5.76        | 7.34        | 15.09       | 2.71        |
| <b>Identified yet undeclared protein #25315 in ProteinLynx output.</b><br>FAKE_25315 | 0.00        | 5.83        | 5.28        | 5.76        | 10.96       |
| <b>Galectin-1</b><br>LEG1                                                            | 16.96       | 14.84       | 12.65       | 20.86       | 17.84       |
| <b>Alcohol dehydrogenase 1</b><br>ADH1                                               | 8.51        | 3.45        | 9.36        | 5.74        | 8.35        |
| <b>Putative uncharacterized protein</b><br>Q3TJ69                                    | 9.70        | 2.29        | 12.74       | 23.67       | 9.60        |
| <b>Importin-5</b><br>IPO5                                                            | 0.84        | 2.31        | 0.00        | 7.36        | 1           |
| <b>Peroxisredoxin-6</b><br>PRDX6                                                     | 5.00        | 8.37        | 15.75       | 11.24       | 10.40       |
| <b>Putative uncharacterized protein</b><br>Q9D1S3                                    | 7.13        | 9.19        | 12.52       | 7.46        | 1.71        |
| <b>14-3-3 protein gamma</b><br>1433G                                                 | 10.54       | 21.58       | 19.96       | 16.97       | 6.43        |
| <b>Heat shock protein 1-like protein</b><br>B2CSK2                                   | 3.94        | 6.91        | 11.44       | 15.28       | 4.92        |

|                                                                                      | Cell line 4 | Cell line 1 | Cell line 2 | Cell line 3 | Cell line 5 |
|--------------------------------------------------------------------------------------|-------------|-------------|-------------|-------------|-------------|
| <b>60S ribosomal protein L10</b><br>RL10                                             | 2.53        | 15.84       | 16.82       | 15.98       | 7.54        |
| <b>Inducible heat shock protein 70</b><br>A1E2B8                                     | 19.95       | 12.78       | 9.58        | 9.42        | 10.56       |
| <b>GTP-binding nuclear protein Ran</b><br>RAN                                        | 8.94        | 8.03        | 12.65       | 15.42       | 6.58        |
| <b>Poly(rC)-binding protein 1</b><br>PCBP1                                           | 7.54        | 4.35        | 4.17        | 5.67        | 10.45       |
| <b>S-formylglutathione hydrolase</b><br>ESTD                                         | 0.84        | 2.31        | 3.26        | 13.20       | 11.11       |
| <b>Malate dehydrogenase, mitochondrial</b><br>MDHM                                   | 23.65       | 18.30       | 1.11        | 1           | 23.52       |
| <b>Nucleosome assembly protein 1-like 1</b><br>NP1L1                                 | 8.54        | 10.01       | 13.72       | 10.48       | 16.89       |
| <b>Enolase</b><br>Q4FK59                                                             | 12.79       | 19.96       | 16.08       | 14.29       | 14.52       |
| <b>60S ribosomal protein L6</b><br>Q3UCH0                                            | 10.41       | 11.24       | 16.82       | 7.46        | 4.67        |
| <b>Putative uncharacterized protein</b><br>Q3U122                                    | 21.30       | 14.79       | 11.68       | 11.37       | 16.68       |
| <b>Eukaryotic translation initiation factor 5A-1</b><br>IF5A1                        | 7.66        | 14.84       | 6.33        | 13.06       | 10.10       |
| <b>Putative uncharacterized protein</b><br>Q5BLJ7                                    | 11.29       | 18.39       | 14.80       | 14.19       | 10.40       |
| <b>60S acidic ribosomal protein P2</b><br>RLA2                                       | 11.42       | 12.54       | 18.75       | 13.20       | 15.93       |
| <b>Putative uncharacterized protein</b><br>Q58ET1                                    | 3.63        | 17.14       | 3.10        | 0.00        | 1           |
| <b>Identified yet undeclared protein #23114 in ProteinLynx output.</b><br>FAKE_23114 | 3.50        | 16.10       | 13.76       | 29.38       | 7.44        |
| <b>Glutathione S-transferase Mu 1</b><br>GSTM1                                       | 6.82        | 15.92       | 7.28        | 12.30       | 6.48        |
| <b>Putative uncharacterized protein</b><br>Q58EU6                                    | 9.07        | 0.00        | 5.26        | 1.86        | 6.48        |
| <b>ATP synthase subunit beta, mitochondrial</b><br>ATPB                              | 7.16        | 0.00        | 1           | 1           | 27.24       |

|                                                                  | <b>Cell line 4</b> | <b>Cell line 1</b> | <b>Cell line 2</b> | <b>Cell line 3</b> | <b>Cell line 5</b> |
|------------------------------------------------------------------|--------------------|--------------------|--------------------|--------------------|--------------------|
| <b>Heat shock protein 2</b><br>Q99KD7                            | 11.51              | 7.94               | 7.34               | 13.30              | 8.79               |
| <b>Rps16 protein</b><br>Q5CZY9                                   | 7.66               | 12.56              | 14.61              | 10.47              | 4.88               |
| <b>Histone H2B</b><br>A2AB77                                     | 14.39              | 9.19               | 6.23               | 2.95               | 22.57              |
| <b>Histone H2A.x</b><br>H2AX                                     | 20.99              | 18.37              | 3.14               | 1                  | 20.81              |
| <b>Enolase</b><br>Q3UJ20                                         | 11.70              | 12.59              | 5.34               | 9.29               | 11.26              |
| <b>Aldehyde dehydrogenase,<br/>mitochondrial</b><br>ALDH2        | 0.00               | 1                  | 1                  | 1                  | 17.74              |
| <b>MC3T3-E1 calyculin</b><br>Q545I9                              | 6.26               | 8.12               | 0.00               | 7.56               | 9.35               |
| <b>Putative uncharacterized protein</b><br>Q9CWK0                | 9.60               | 12.72              | 11.55              | 10.57              | 7.44               |
| <b>Putative uncharacterized protein<br/>(Fragment)</b><br>Q3U8X6 | 3.63               | 20.61              | 6.17               | 9.44               | 8.19               |
| <b>Protein S100-A11</b><br>S10AB                                 | 2.79               | 7.06               | 8.29               | 5.50               | 12.97              |
| <b>Putative uncharacterized protein</b><br>Q3UKW2                | 1.06               | 2.46               | 0.00               | 1.89               | 12.06              |
| <b>Glutathione S-transferase Mu 2</b><br>GSTM2                   | 0.00               | 12.54              | 0.00               | 0.90               | 1                  |
