# Supplementary material for: Role of cytoskeletal proteins in cerebral cavernous malformation signaling pathways: a proteomic analysis
Source: Royal Society of Chemistry journal article supplement (doi:10.1039/c3mb70199a), 2014-04-17
Supplement: c3mb70199a2.pdf [file c3mb70199a2.pdf]

| <b>Supplementary Table 2 - Top Molecules for Fold Change from Pathway Analysis (CCM1, CCM2, CCM3)</b> |                   |                      |                   |
|-------------------------------------------------------------------------------------------------------|-------------------|----------------------|-------------------|
| <b>CCM1</b>                                                                                           |                   |                      |                   |
| <b>Upregulated</b>                                                                                    | <b>Exp. Value</b> | <b>Downregulated</b> | <b>Exp. Value</b> |
| <b>MYH9</b>                                                                                           | 34.520            | <b>PTBP1</b>         | -12.038           |
| <b>GSTM1</b>                                                                                          | 15.675            | <b>FLNA*</b>         | -7.258            |
| <b>ESD</b>                                                                                            | 2.750             | <b>Serpib9b</b>      | -4.236            |
| <b>S100A11</b>                                                                                        | 2.530             | <b>ACTN4</b>         | -3.293            |
| <b>GSTM5</b>                                                                                          | 2.334             | <b>PABPC1</b>        | -2.465            |
| <b>Calm1 (includes others)</b>                                                                        | 2.321             | <b>TLN1</b>          | -2.176            |
| <b>YWHAG</b>                                                                                          | 2.047             | <b>NCL</b>           | -1.917            |
| <b>EIF5A</b>                                                                                          | 1.937             | <b>ACTA2</b>         | -1.440            |
| <b>HSP90AA1</b>                                                                                       | 1.876             | <b>ANXA2</b>         | -1.420            |
| <b>PRDX6</b>                                                                                          | 1.674             | <b>HSPD1</b>         | -1.333            |
|                                                                                                       |                   |                      |                   |
| <b>CCM2</b>                                                                                           |                   |                      |                   |
| <b>Upregulated</b>                                                                                    | <b>Exp. Value</b> | <b>Downregulated</b> | <b>Exp. Value</b> |
| <b>ESD</b>                                                                                            | 3.881             | <b>HSPD1</b>         | -30.924           |
| <b>PRDX6</b>                                                                                          | 3.150             | <b>ACTN4</b>         | -8.542            |
| <b>S100A11</b>                                                                                        | 2.971             | <b>S100A6</b>        | -7.825            |
| <b>TAGLN2</b>                                                                                         | 2.119             | <b>TLN1</b>          | -4.859            |
| <b>PGK1</b>                                                                                           | 2.055             | <b>PTBP1</b>         | -3.987            |
| <b>RPS16</b>                                                                                          | 1.907             | <b>PABPC1</b>        | -3.521            |
| <b>YWHAG</b>                                                                                          | 1.894             | <b>ENO2</b>          | -2.191            |
| <b>RPS3A</b>                                                                                          | 1.756             | <b>FLNA*</b>         | -1.923            |
| <b>RPS2</b>                                                                                           | 1.658             | <b>ACTA2</b>         | -1.824            |
| <b>HSP90AA1</b>                                                                                       | 1.605             | <b>HSP90B1</b>       | -1.778            |
|                                                                                                       |                   |                      |                   |
| <b>CCM3</b>                                                                                           |                   |                      |                   |

| <b>Supplementary Table 2 - Top Molecules for Fold Change from Pathway Analysis (CCM1, CCM2, CCM3)</b> |            |                      |            |
|-------------------------------------------------------------------------------------------------------|------------|----------------------|------------|
| <b>Upregulated</b>                                                                                    | Exp. Value | <b>Downregulated</b> | Exp. Value |
| <b>MYH9</b>                                                                                           | 161.970    | <b>HSPD1</b>         | -40.587    |
| <b>ESD</b>                                                                                            | 15.714     | <b>ACTN4</b>         | -22.638    |
| <b>PGK1</b>                                                                                           | 2.812      | <b>TLN1</b>          | -3.464     |
| <b>Serpinb9b</b>                                                                                      | 2.440      | <b>PABPC1</b>        | -3.285     |
| <b>PRDX6</b>                                                                                          | 2.248      | <b>HSP90B1</b>       | -2.205     |
| <b>S10A11</b>                                                                                         | 1.971      | <b>FLNA*</b>         | -1.982     |
| <b>GSTM5</b>                                                                                          | 1.804      | <b>ACTA2</b>         | -1.873     |
| <b>Calm1 (includes others)</b>                                                                        | 1.783      | <b>NCL</b>           | -1.748     |
| <b>EIF5A</b>                                                                                          | 1.705      | <b>HSPA5</b>         | -1.745     |
| <b>YWHAG</b>                                                                                          | 1.610      | <b>SERPINH1</b>      | -1.546     |
