# Supplementary material for: Role of cytoskeletal proteins in cerebral cavernous malformation signaling pathways: a proteomic analysis
Source: Royal Society of Chemistry journal article supplement (doi:10.1039/c3mb70199a), 2014-04-17

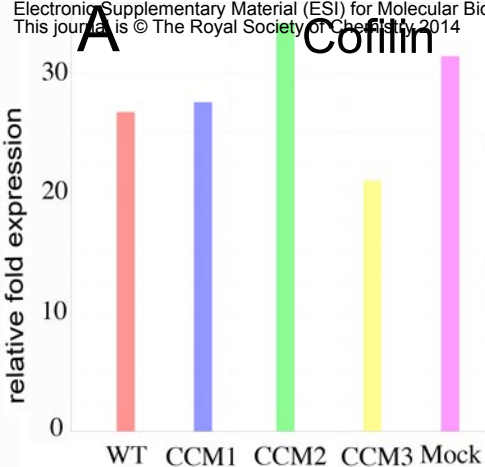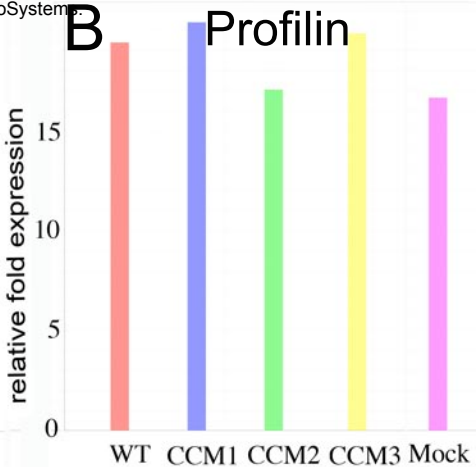

Supplement: c3mb70199a3.pdf [file c3mb70199a3.pdf]
